# Supplementary material for: The electrophilic effect of thiol groups on thiol–yne thermal click polymerization for hyperbranched polythioether
Source: Royal Society of Chemistry journal article supplement (doi:10.1039/c5py00307e), 2015-01-01
Supplement: c5py00307e1.pdf [file c5py00307e1.pdf]

# The Electrophilic Effect of Thiol Group on Thiol-yne Thermal Click Polymerization for Hyperbranched Polythioether

Bo Zhao,<sup>a</sup> Yaochen Zheng,<sup>a,b</sup> Zhulin Weng,<sup>a,c</sup> Shengying Cai,<sup>a</sup> and Chao Gao<sup>a\*</sup>

<sup>a</sup> MOE Key Laboratory of Macromolecular Synthesis and Functionalization, Department of Polymer Science and Engineering, Zhejiang University, Hangzhou 310027, P. R. China

<sup>b</sup> Department of Polymer Science and Engineering, College of Chemistry and Chemical Engineering, Yantai University, 30 Qingquan Road, Yantai 264005, P. R. China

<sup>c</sup> School of Mathematical and Physical Sciences, Hubei University for Nationalities, Enshi, 445000, P. R. China

## Figure and table of contents:

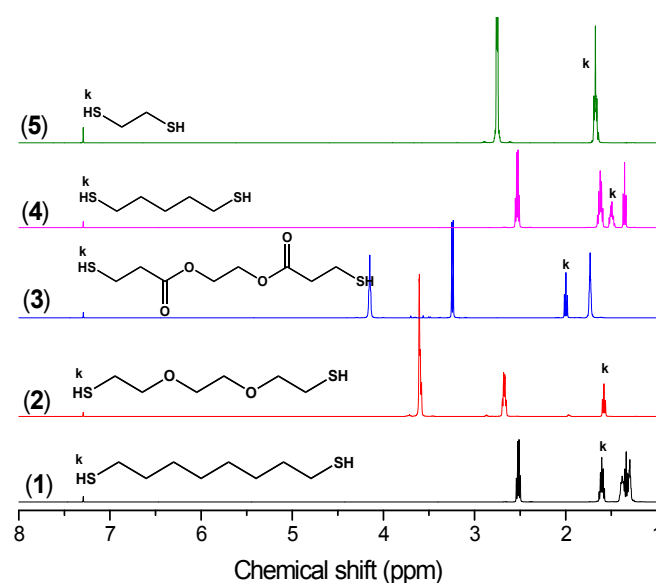

Fig. S1 <sup>1</sup>H NMR spectra of the starting materials 1-5.

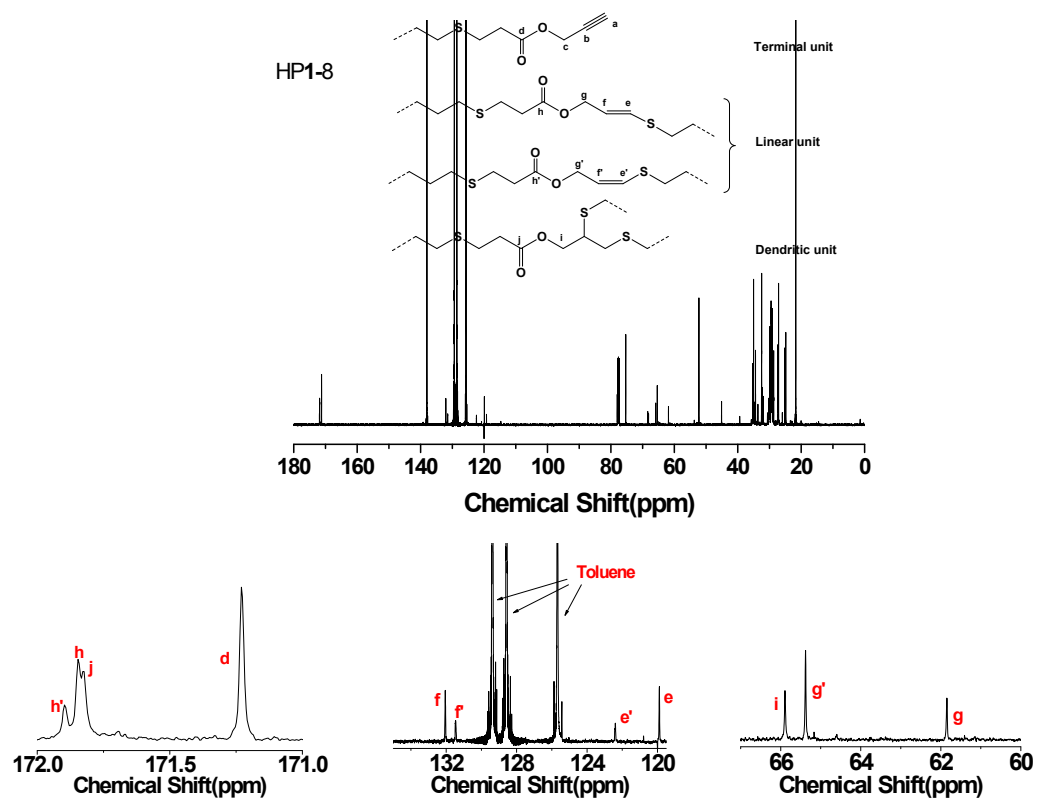

Fig. S2  $^{13}\text{C}$  NMR spectra of HP1-8.

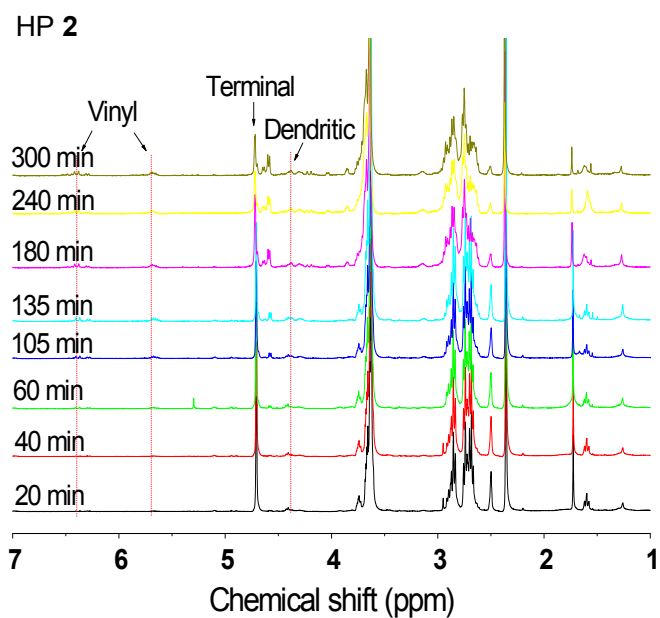

Fig. S3  $^1\text{H}$  NMR spectra of the HP 2 recorded at given time intervals.

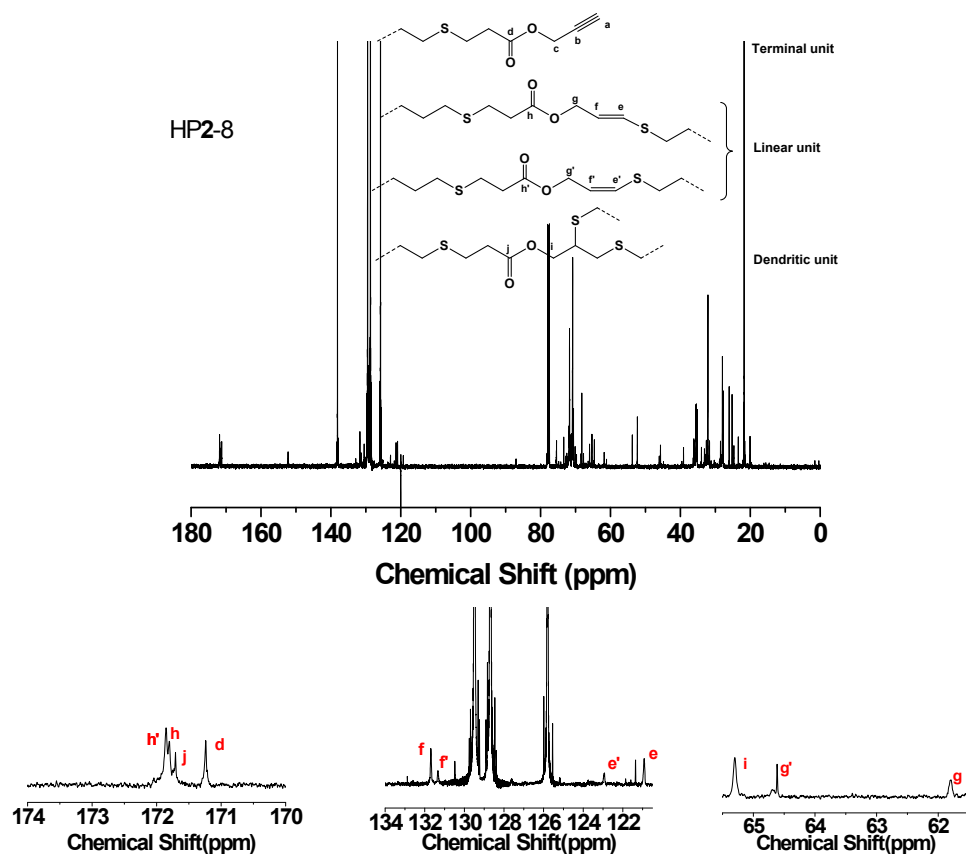

Fig. S4  $^{13}\text{C}$  NMR spectra of HP 2-8.

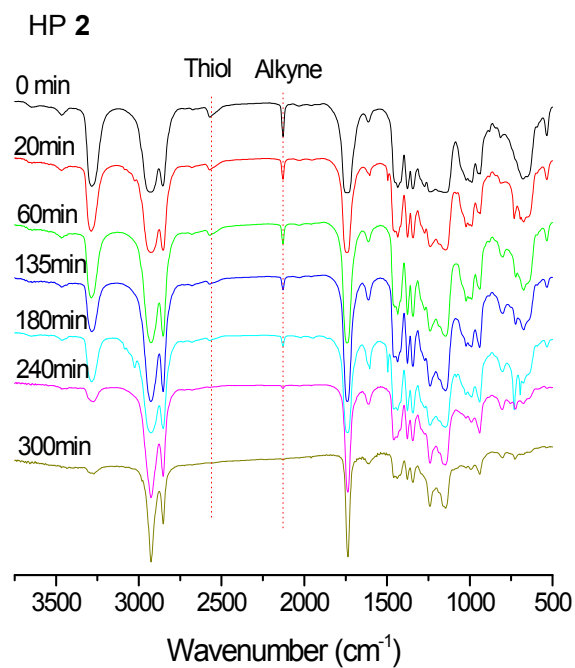

Fig. S5 FTIR spectra of the HP 2 recorded at given time intervals.

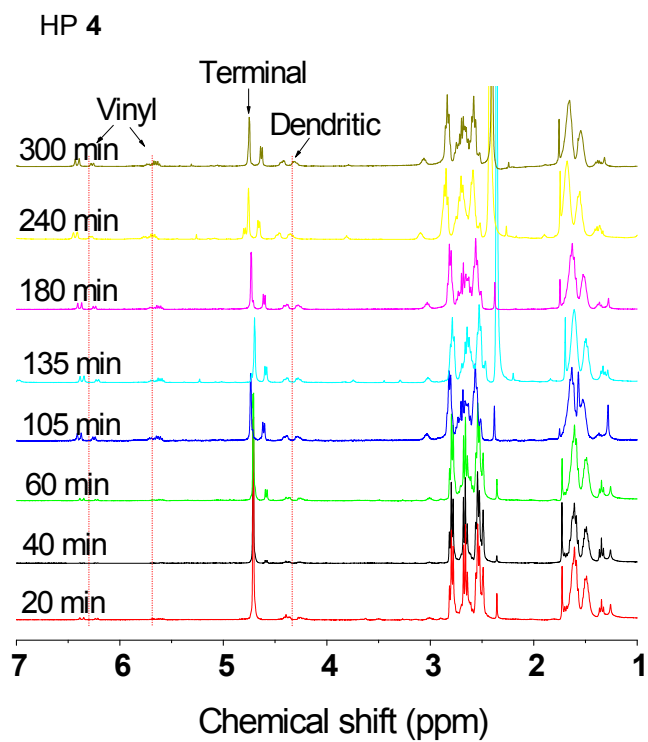

Fig. S6  $^1\text{H}$  NMR spectra of the HP 4 recorded at given time intervals.

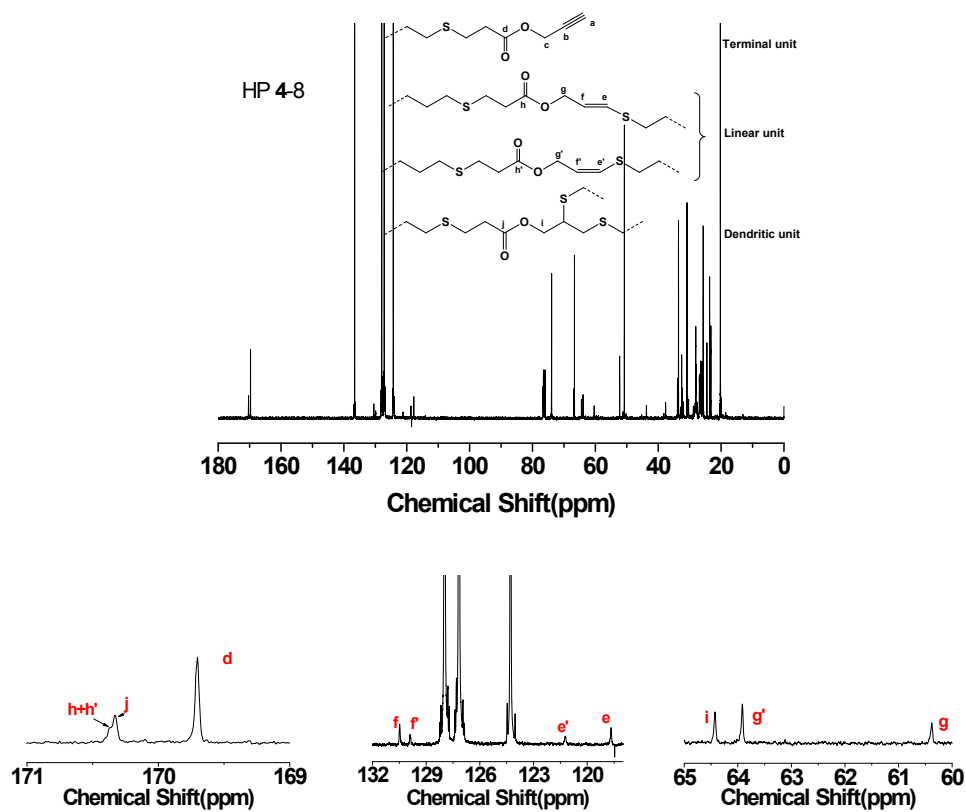

Fig. S7  $^{13}\text{C}$  NMR spectra of HP 4-8.

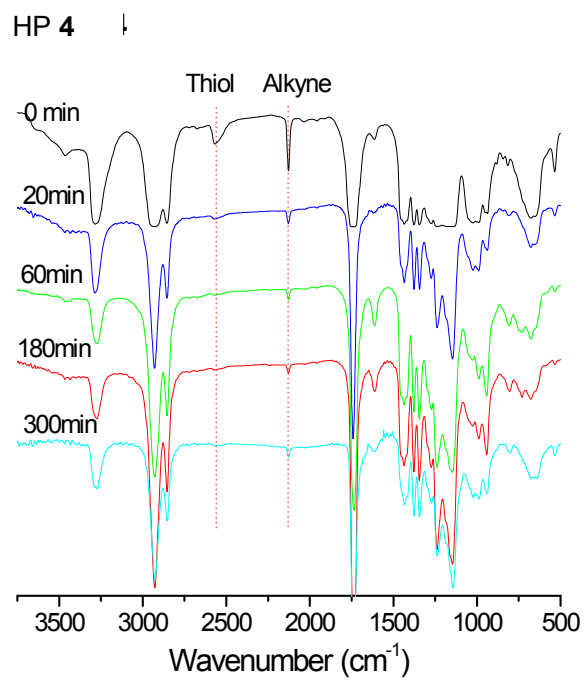

**Fig. S8** FTIR spectra of the HP 4 recorded at given time intervals.
